# Supplementary material
Source: PubMed Central journal article supplement (PMC9922386)
Supplement: kiac545_supplementary_data.pdf [file kiac545_supplementary_data.pdf]

## Supplemental Data

**Supplemental Figure S1.** Using different housekeeping genes (*ACTIN*, *TIP41* and *PP2C1A*) gave similar results in gene expression analyses in tomato seeds.

**Supplemental Figure S2.** Sequence analyses of *ait1.1* #2 and *ait1.2* CRISPR mutant alleles.

**Supplemental Figure S3.** Loss of *AIT1.1* promoted germination in additional independent allele.

**Supplemental Figure S4.** Loss of *AIT1.1* did not affect seed longevity.

**Supplemental Figure S5.** ABA deficiency reduced seed longevity.

**Supplemental Figure S6.** Loss of *AIT1.1* did not affect the expression of the other *AIT1* genes.

**Supplemental Figure S7.** *AIT1.1* did not affect endosperm inhibition of embryo growth.

**Supplemental Figure S8.** Loss of *AIT1.1* did not affect post-emergence radicle elongation.

**Supplemental Figure S9.** Increased germination under salinity conditions in additional independent *ait1.1* allele

**Supplemental Figure S10.** Loss of *AIT1.1* increased germination uniformity under normal and stress conditions.

**Supplemental Figure S11.** Salt or ABA treatments did not affect *AIT1.1* expression seeds.

**Supplemental Figure S12.** Loss of *AIT1.1* did not affect fruit yield in the field.

**Supplemental Table S1.** gRNAs used in this study.

**Supplemental Table S2.** Primers used in this study.

## Supplemental Figures

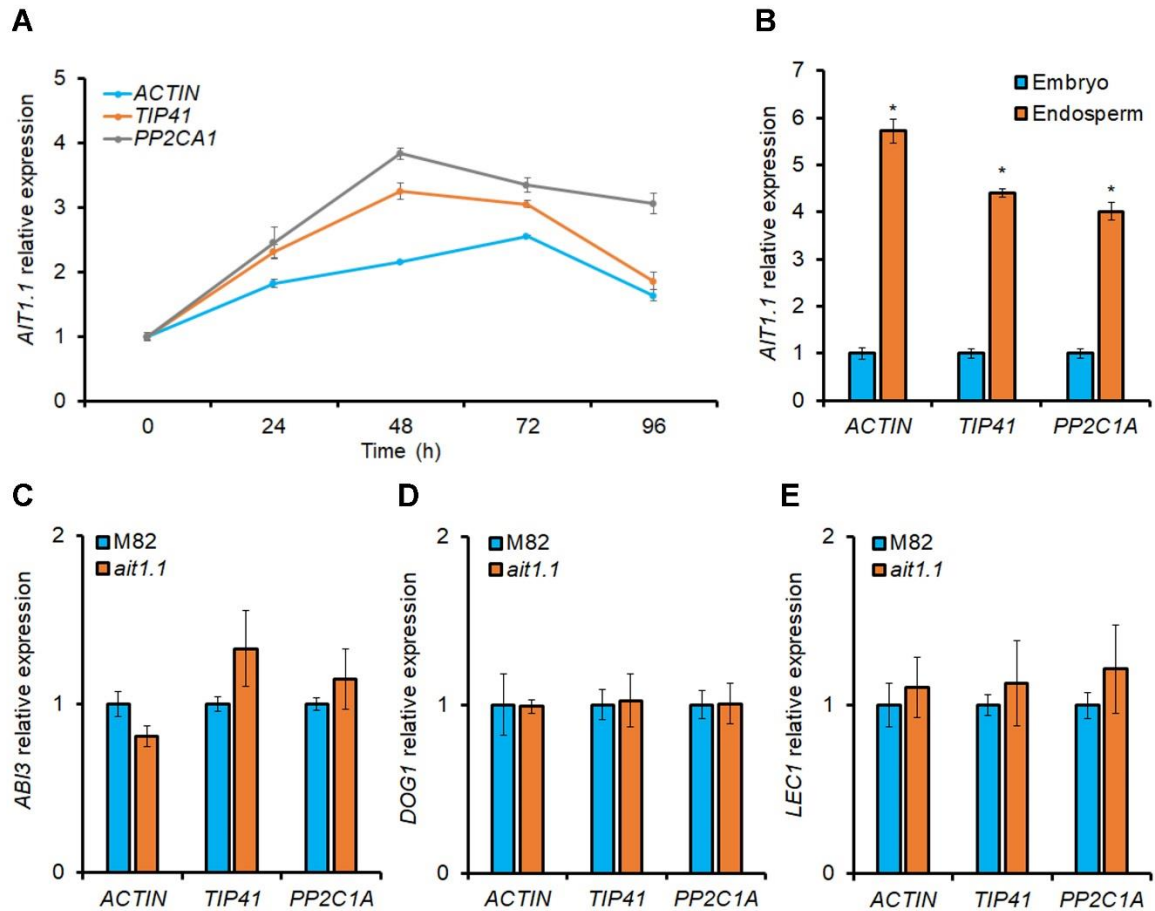

**Supplemental Figure S1.** Using different housekeeping genes (*ACTIN*, *TIP41* and *PP2CA1*) gave similar results in gene expression analyses in tomato seeds. (A) Relative expression of *AIT1.1* in dry (0h) seeds and following imbibition (24-96h). (B) Relative expression of *AIT1.1* in isolated embryos or embryo-less endosperms. (C-E) Relative expression of the central dormancy-related genes *ABI3* (C), *DOG1* (D) and *LEC1* (E) in M82 and *ait1.1* dry seeds stored for 1 month. Values in A-E are means of 4 replicates, each contains 10 seeds  $\pm$ SE. Stars in B represent significant differences between respective treatments by Student's *t* test ( $P < 0.05$ ).

**A**

M82- GACTAATTTATGGGCACAGCATTTTTATTGGCACTTCTTGGTGGATTCTTA

*ait1.1#2*- GACTAATTTATGGGCACAGCATTTTTATTGGCACTT - 65 bp insertion // 3037 bp deletion

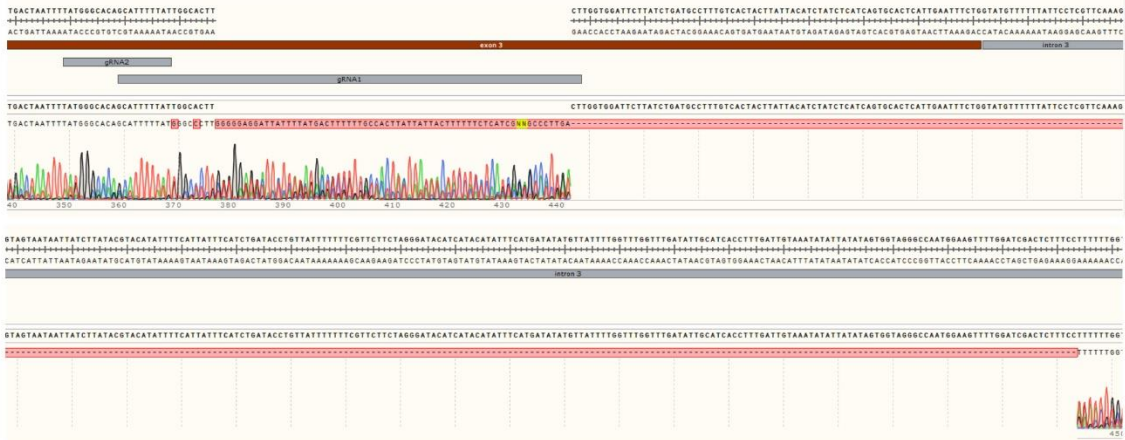

**B**

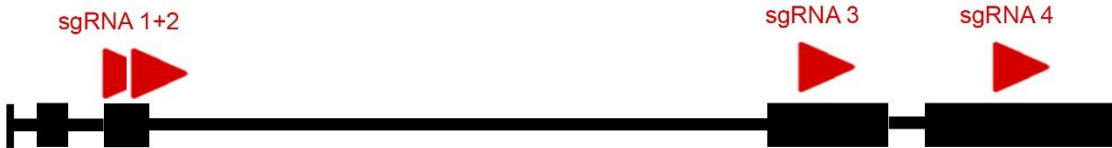

M82- GACTAATTTATGGGCACAGCATTTTTATTGGCACTTCTTGGTGGATTCTTA

*ait1.2*- GACTAATTTATGGGCACAGCATTTTTATTGGC - - - -TTGGTGGATTCTTA

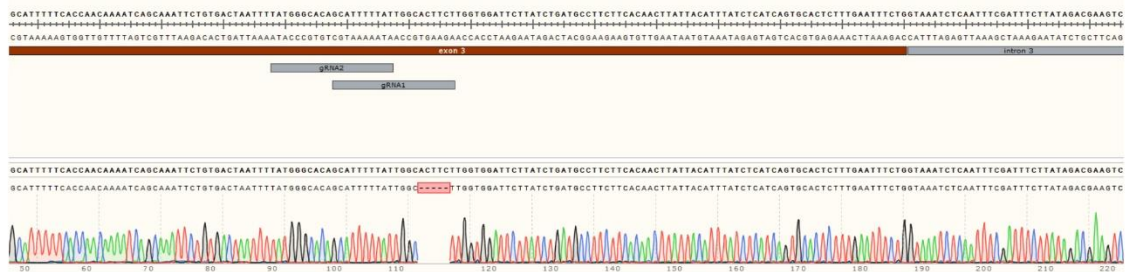

**Supplemental Figure S2.** Sequence analyses of *ait1.1 #2* and *ait1.2* CRISPR mutant alleles. (A) The sequence of *ait1.1#2*. RNA guide1 and 2 (red letters) and the chromatograms *ait1.1#2*. (B) Schematic structure of *AIT1.2* with the positions of four RNA guides (red arrows) in the third, fourth and fifth exons. Also shown RNA guide1 and 2 (red letters) and the chromatograms of *ait1.2*.

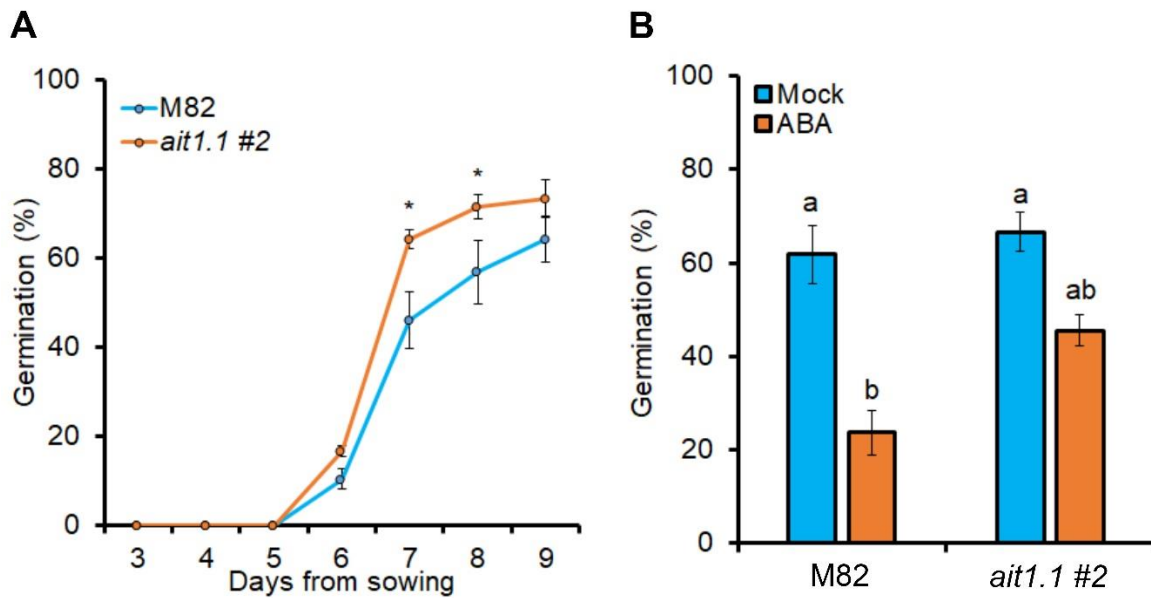

**Supplemental Figure S3.** Loss of *AIT1.1* promoted germination in additional independent allele. (A) Germination of M82 and *ait1.1 #2* (3037 bp deletion in exon and intron 3 (see also Fig. S2)). (B) Percentages of germinated seeds after 10 days in petri dishes with or without 5 $\mu$ M abscisic acid (ABA). Values are means of 3 replicates each contains 50 seeds  $\pm$ SE. Stars in A represent significant differences between respective treatments by Student's *t* test ( $P < 0.05$ ). Small letters in B represent significant differences between respective treatments by Tukey-Kramer HSD test ( $P < 0.05$ ).

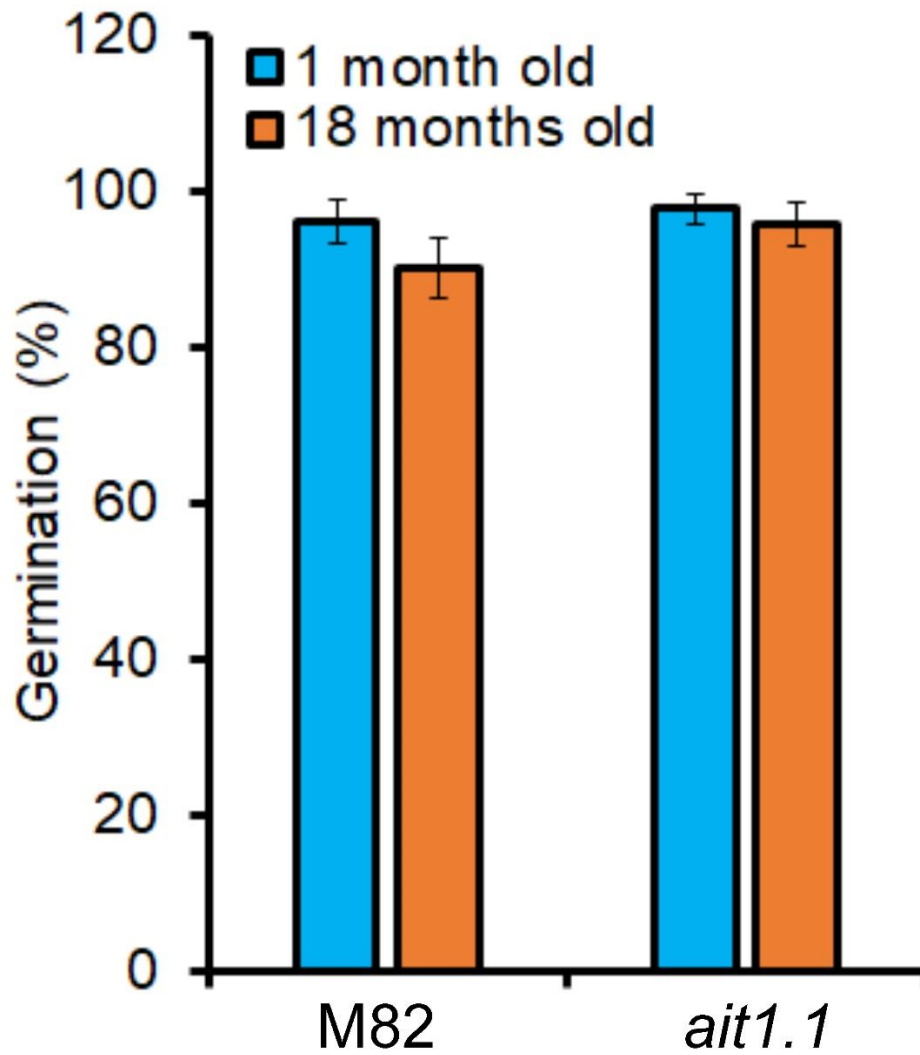

**Supplemental Figure S4.** Loss of *AIT1.1* did not affect seed longevity. Germination of M82 and *ait1.1* seeds stored for 1 or 18 months. Values are means of 3 replicates each contains 50 seeds  $\pm$ SE.

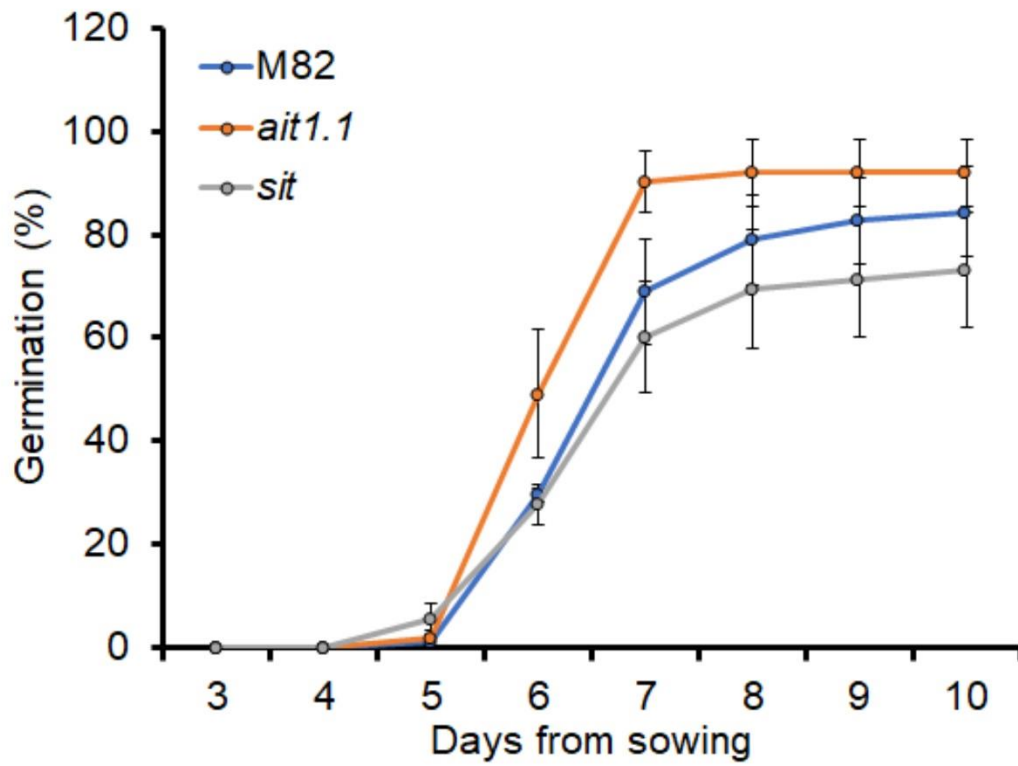

**Supplemental Figure S5.** Abscisic acid (ABA) deficiency reduced seed longevity. Germination of M82, ABA-deficient mutant *sit* and *ait1.1* seeds stored for 18 months. Values are means of 3 replicates each contains 50 seeds  $\pm$ SE.

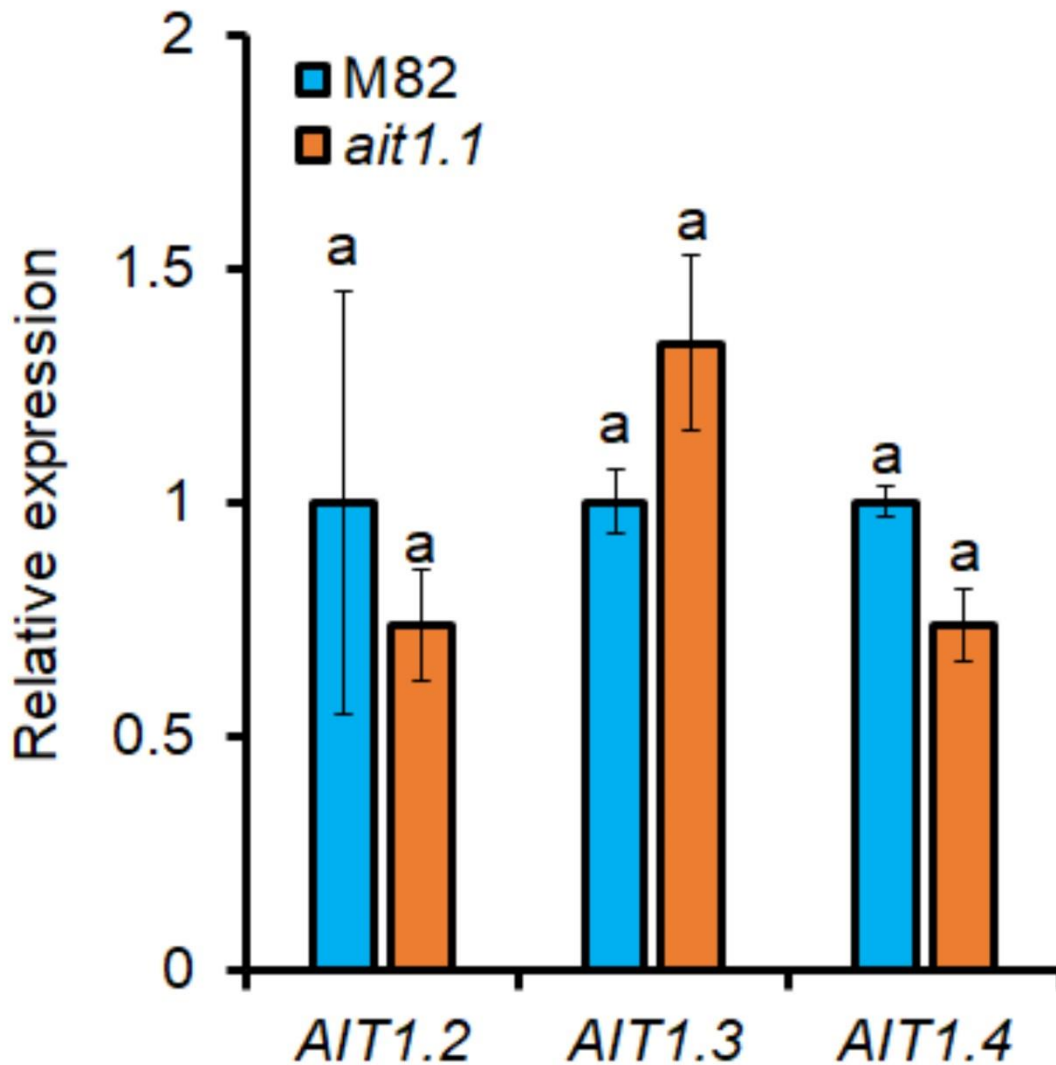

**Supplemental Figure S6.** Loss of *AIT1.1* did not affect the expression of the other *AIT1* genes. Relative expression of *AIT1.2*, *AIT1.3* and *AIT1.4* in M82 and *ait1.1* seeds 48h following imbibition. Values are means of 4 replicates each contains 10 seeds  $\pm$ SE. Small letters represent significant differences between respective lines by Tukey-Kramer HSD test ( $P < 0.05$ ).

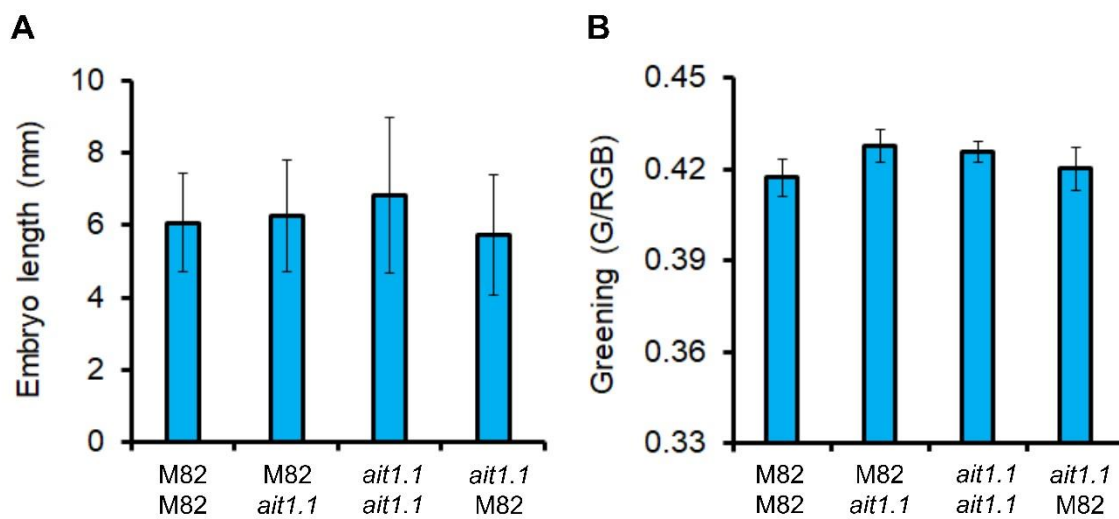

**Supplemental Figure S7.** *AIT1.1* did not affect endosperm inhibition of embryo growth. Length (A) and greening (G/RGB, see methods)(B) of M82 and *ait1.1* isolated embryos (upper), placed for 72h on a layer of endosperms (lower). Values are means of 10 biological replicates  $\pm$ SE.



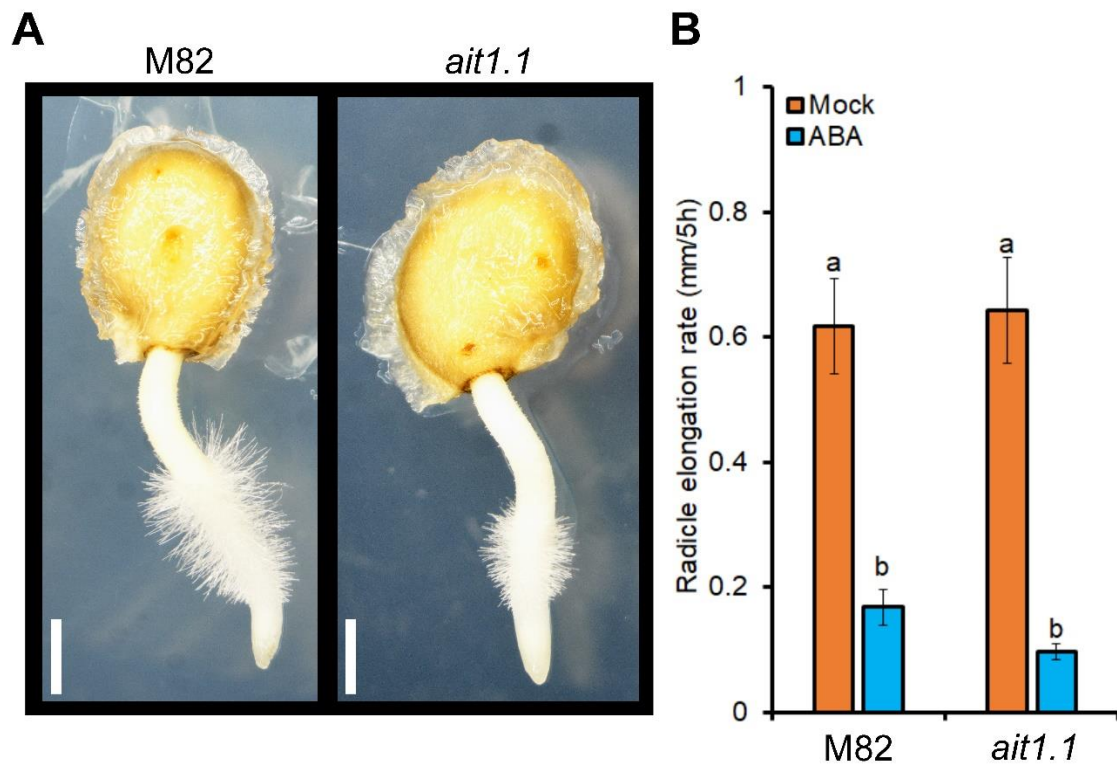

**Supplemental Figure S8.** Loss of *AIT1.1* did not affect post-emergence radicle elongation. (A) Representative M82 and *ait1.1* germinating seeds following scarification. (B) Radicle elongation-rate of M82 and *ait1.1* following scarification in petri dishes containing Murashige & Skoog (MS) medium with (or without) 5 $\mu$ M abscisic acid (ABA). Values are means of 8 biological replicates  $\pm$ SE. Small letters (B) represent significant differences between respective treatments by Tukey-Kramer HSD test ( $P < 0.05$ ). Scale bar = 1 mm.

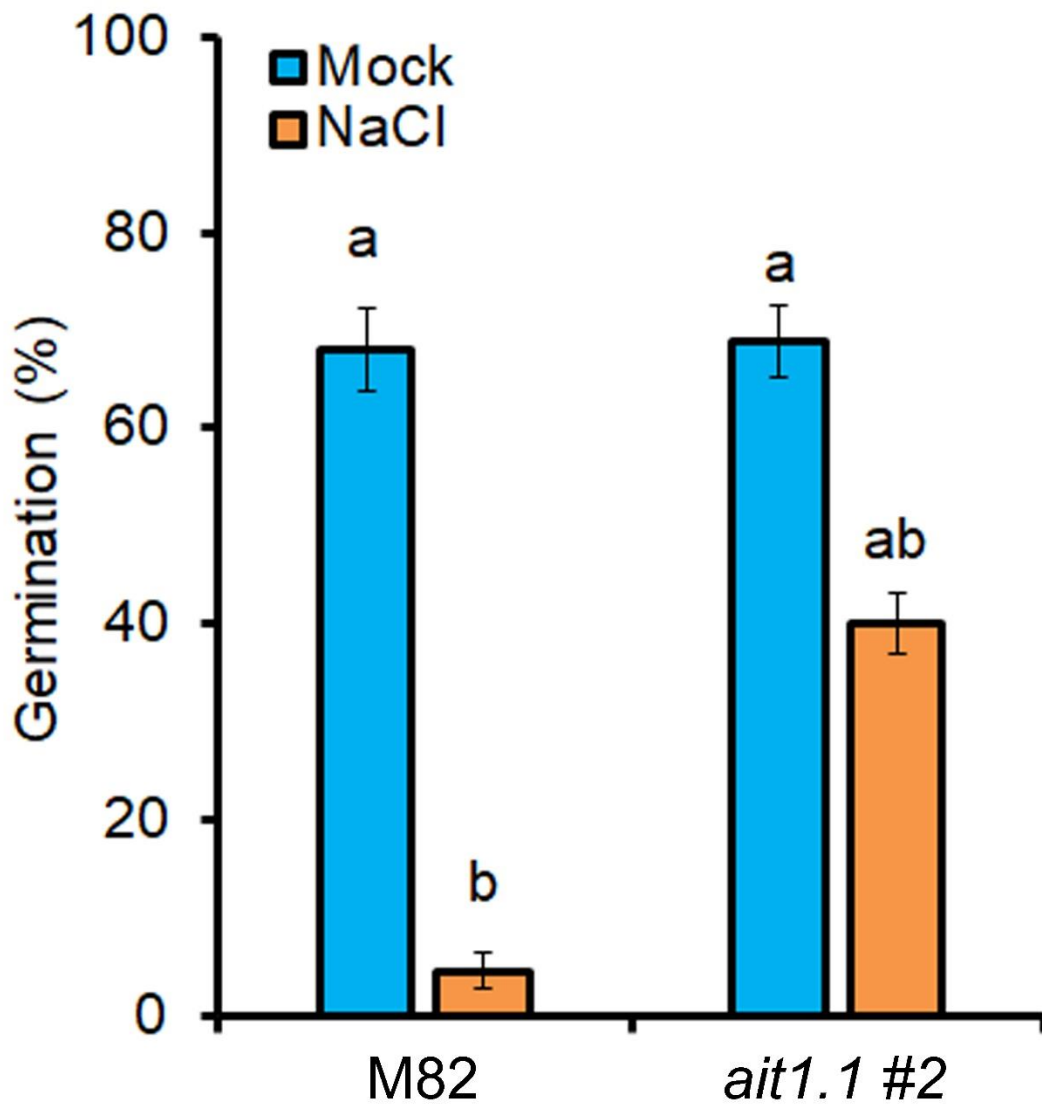

**Supplemental Figure S9.** Increased germination under salinity conditions in additional independent *ait1.1* allele. Percentages of germinated seeds after 7 days on Petri dishes with or without 50mM NaCl. Values are means of 3 independent replicates each contained 50 seeds  $\pm$ SE. Small letters represent significant differences between respective treatments by Tukey-Kramer HSD test ( $P < 0.05$ ).

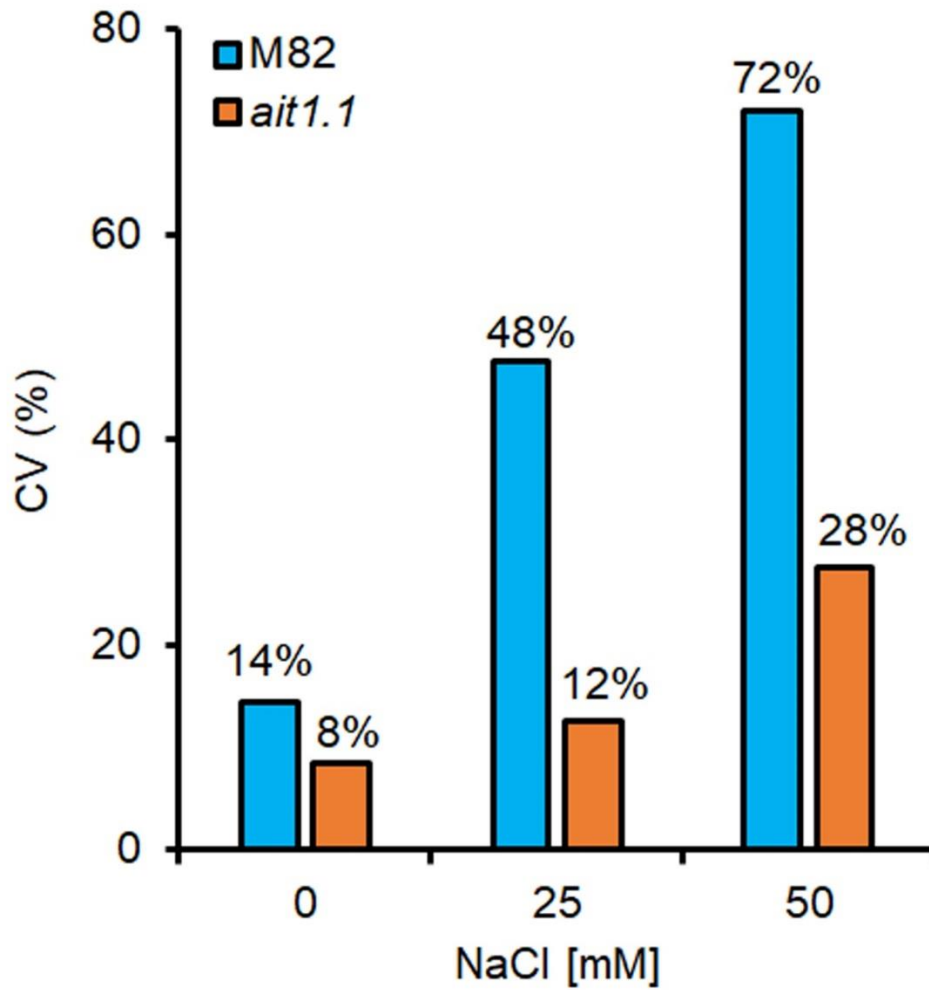

**Supplemental Figure S10.** Loss of *AIT1.1* increased germination uniformity under normal and stress conditions. Co-efficient variance (CV- standard deviation/mean) of M82 and *ait1.1* germination under different concentrations of NaCl. Sample size for each line and treatment was approximately 100 seeds.

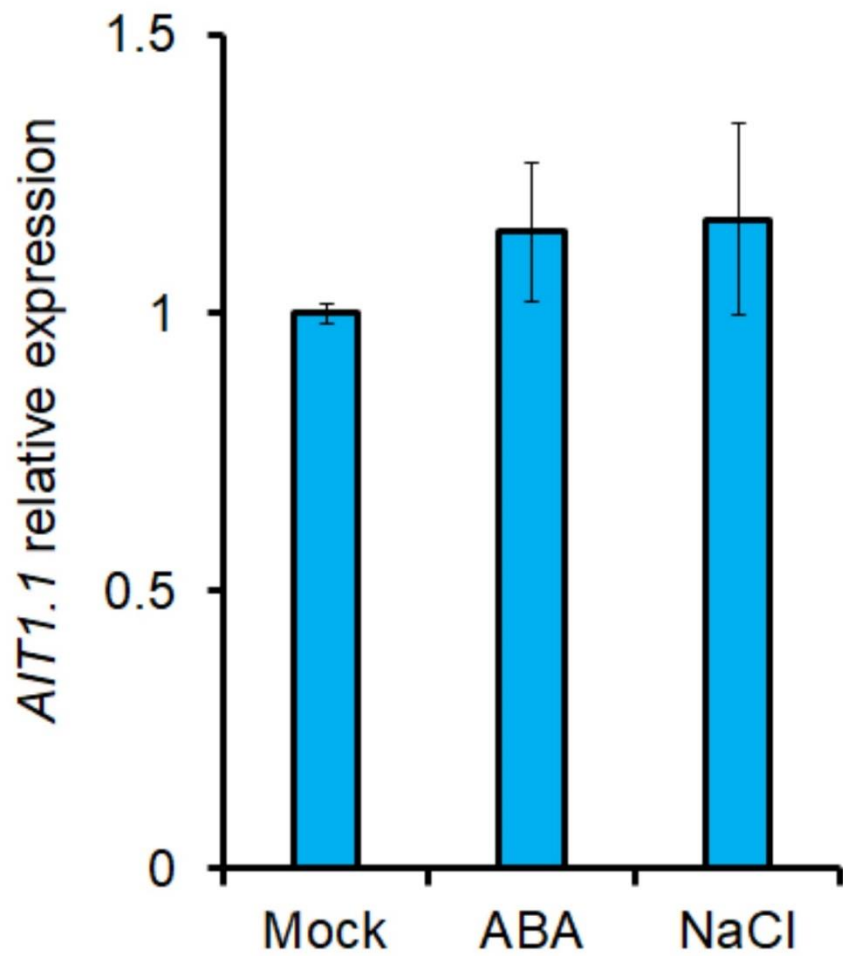

**Supplemental Figure S11.** Salt or abscisic acid (ABA) treatments did not affect *AIT1.1* expression in seeds. Relative expression of *AIT1.1* in seeds treated for 48h with (or without) 10 $\mu$ M ABA or 50mM NaCl. Values are means of 4 replicates each contains 10 seeds  $\pm$ SE.

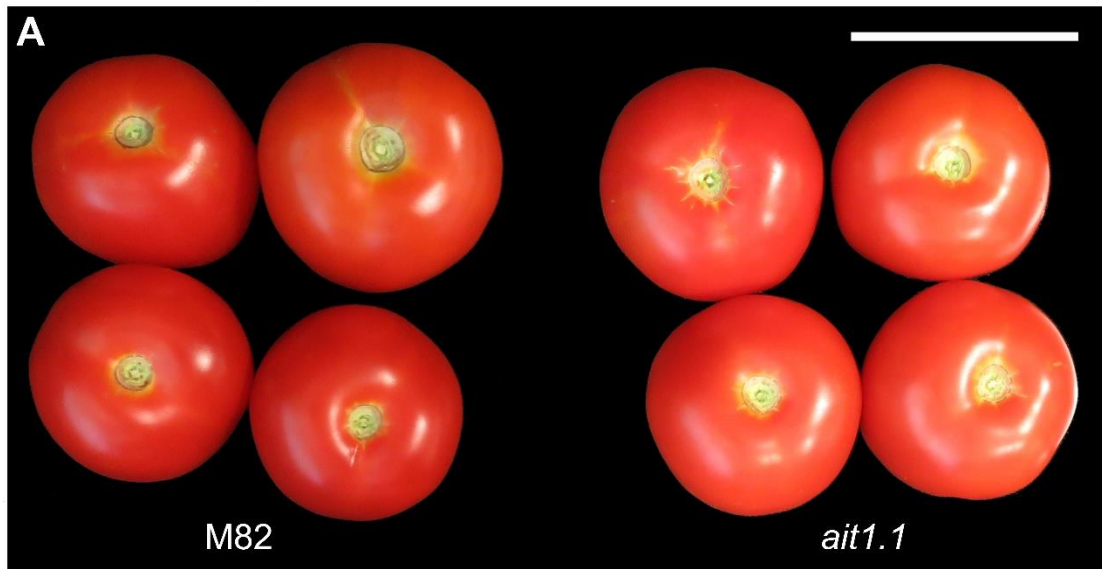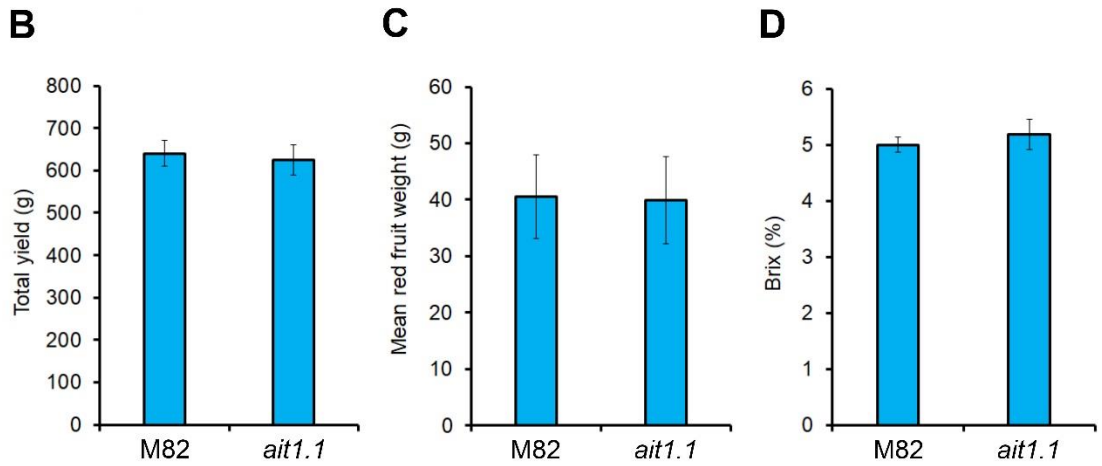

**Supplemental Figure S12.** Loss of *AIT1.1* did not affect fruit yield in the field. (A) Representative M82 and *ait1.1* red-ripened fruits. The images were digitally extracted for comparison. (B) Total fruit yield per plant (green and red fruits). (C) Mean weight of red-ripened fruit. (D) Brix of red-ripened fruits. Values are means of 20 plants  $\pm$ SE. Scale bar in A = 5 cm.

## Supplemental Tables

**Supplemental Table S1.** gRNAs used in this study.

| Gene                   | Used for | Sequence (5'-3')     |
|------------------------|----------|----------------------|
| <i>AIT1.1/2</i> gRNA-1 | CRISPR   | GCATTTTTATTGGCACTTCT |
| <i>AIT1.1/2</i> gRNA-2 | CRISPR   | TATGGGCACAGCATTTTTAT |
| <i>AIT1.1/2</i> gRNA-3 | CRISPR   | TTAGGCGTTGGAGGTATAAA |
| <i>AIT1.1/2</i> gRNA-4 | CRISPR   | CGTAGTATTCATCATGATCT |

**Supplemental Table S2.** Primers used in this study.

| Gene          | Used for | Sequence (5'-3')                                                 |
|---------------|----------|------------------------------------------------------------------|
| <i>ACTIN</i>  | RT-qPCR  | Forward- GTCCTCTTCCAGCCATCCAT<br>Reverse- ACCACTGAGCACAATGTTACCG |
| <i>TIP41</i>  | RT-qPCR  | Forward- ATCGAGTGTCGCAAGCTTTT<br>Reverse- CGGCAAGTGAGTTGTCTGAA   |
| <i>PP2AC1</i> | RT-qPCR  | Forward- ATGGAGTGCAAGCCGTTATC<br>Reverse- GCACATTCCATTCTCCACT    |
| <i>AIT1.1</i> | RT-qPCR  | Forward- GTGGAAGCCCTCTCACAACA<br>Reverse- CTTCGCCATTTTCCTTGCCC   |

|                       |         |                                                                    |
|-----------------------|---------|--------------------------------------------------------------------|
| <i>AIT1.2</i>         | RT-qPCR | Forward- ATCGAGAAGCCTTAGCTTCCTT<br>Reverse- GAAAATCGGGAACAGTTTCATC |
| <i>AIT1.3</i>         | RT-qPCR | Forward- GGCATTGGGTGTTGGAGGTA<br>Reverse- TCGCCGTCAAATTGTTTCAGC    |
| <i>AIT1.4</i>         | RT-qPCR | Forward- CTTGTGGCGGCATTTTCCAA<br>Reverse- CCATGTCCTTCTTCCGCACT     |
| <i>ABI3</i>           | RT-qPCR | Forward- TTGGGTATGTTGGCCTTCTC<br>Reverse- TCTGCTGGTTCTGTGATTGC     |
| <i>FUS3</i>           | RT-qPCR | Forward- GCGGTATTCCGAGGTTATGA<br>Reverse- GTTGTCCATTGCAGGGAAGT     |
| <i>DOG1</i>           | RT-qPCR | Forward- CGAGCTAAACGACGACGAAT<br>Reverse- CACCAAGTAGGGGCAAAGAA     |
| <i>LEC1</i>           | RT-qPCR | Forward- GCTACCGTAGGTTCCCACAA<br>Reverse- TCGCGTCGTCTGATATCTTG     |
| <i>β1-3-glucanase</i> | RT-qPCR | Forward- AATGCAGCAACATGCTTGAG<br>Reverse- GGGGGAAAACAGACCAAAT      |
| <i>EXPA2</i>          | RT-qPCR | Forward- GTGCAATGTCAATGCTGACC<br>Reverse- TTAGCCAGGGCATAGTTTGG     |
| <i>MAN2</i>           | RT-qPCR | Forward- AGGAACGATGGGAGGAAGTT<br>Reverse- CCAGCAGTGGATGGATTTTT     |
| <i>RAB18</i>          | RT-qPCR | Forward- CTCAAGGCATGGGTACTGGT<br>Reverse- CCTTCTTTCTCCTCCCACCT     |
| <i>RD29</i>           | RT-qPCR | Forward- CGGAAGCAACACGAATGAG                                       |

|  |  |                                  |
|--|--|----------------------------------|
|  |  | Reverse- TTCCATGATCAAATTGAAAATCC |
|--|--|----------------------------------|
